# Supplementary material
Source: PubMed Central journal article supplement (PMC3806261)
Supplement: ismej2013108x1.pdf [file ismej2013108x1.pdf]

1 **Supplementary Figures**

2

3

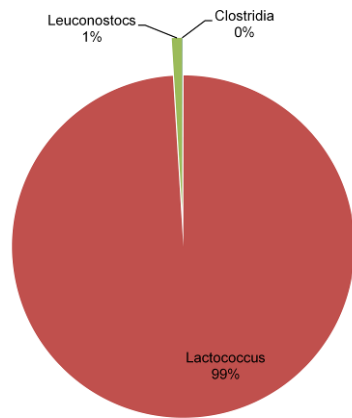

4

5 Supplementary Figure 1. Taxonomic composition of the classified 16S

6 rRNA reads in the metagenome of the undefined cheese starter

7 culture.

8

9

10

11

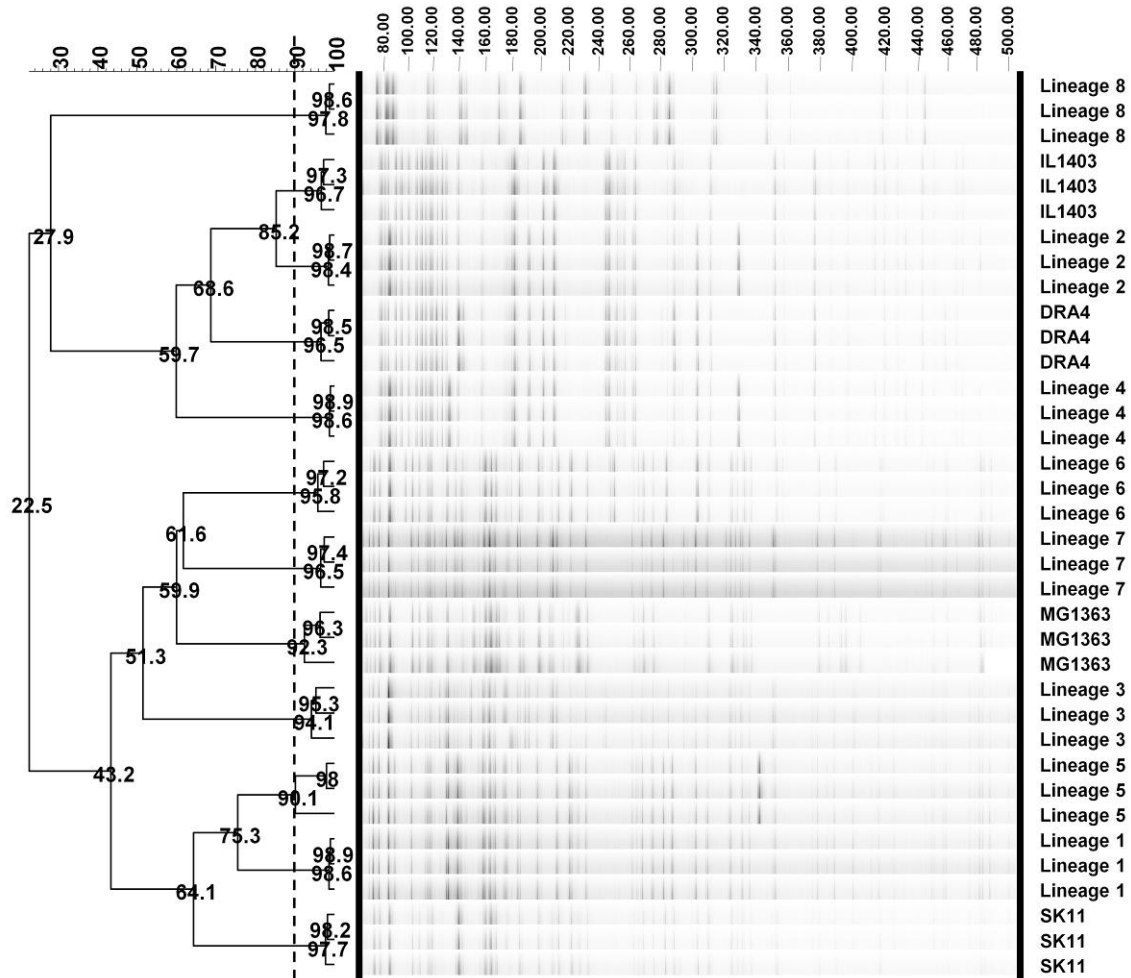

12  
13  
14  
15  
16  
17  
18  
19  
20  
21  
22  
23  
24

Supplementary Figure 2. Clustering of AFLP profiles of 3 independently picked representatives for the genetic lineages found in starter culture and independent triplicate profiles of the reference *L. Lactis* strains IL1403, MG1363, SK11, and DRA4. Clustering was based on Pearson correlation coefficient on the range of (80-500) base pairs. Similarity of the genetic profiles of less than 90% similarity (dotted line) was considered as cut-off for defining separate genetic lineages.

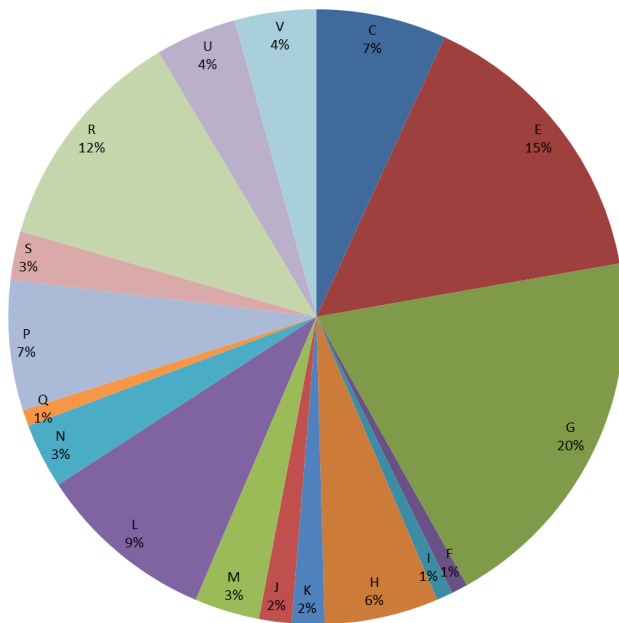

- INFORMATION STORAGE AND PROCESSING
  - [J] Translation, ribosomal structure and biogenesis
  - [A] RNA processing and modification
  - [K] Transcription
  - [L] Replication, recombination and repair
  - [B] Chromatin structure and dynamics
- CELLULAR PROCESSES AND SIGNALING
  - [D] Cell cycle control, cell division, chromosome partitioning
  - [Y] Nuclear structure
  - [V] Defense mechanisms
  - [T] Signal transduction mechanisms
  - [M] Cell wall/membrane/envelope biogenesis
  - [N] Cell motility
  - [Z] Cytoskeleton
  - [W] Extracellular structures
  - [U] Intracellular trafficking, secretion, and vesicular transport
  - [O] Posttranslational modification, protein turnover, chaperones
- METABOLISM
  - [C] Energy production and conversion
  - [G] Carbohydrate transport and metabolism
  - [E] Amino acid transport and metabolism
  - [F] Nucleotide transport and metabolism
  - [H] Coenzyme transport and metabolism
  - [I] Lipid transport and metabolism
  - [P] Inorganic ion transport and metabolism
  - [Q] Secondary metabolites biosynthesis, transport and catabolism
- POORLY CHARACTERIZED
  - [R] General function prediction only

25  
26  
27  
28  
29  
30  
31  
32  
33  
34  
35  
36  
37  
38  
39  
40  
41  
42  
43

Supplementary Figure 3. Distribution of COG Categories for the 204 OGs conserved exclusively on TIFN1-to-7 *L. lactis* core-genome, but not conserved for the reference *L. lactis* strains

44

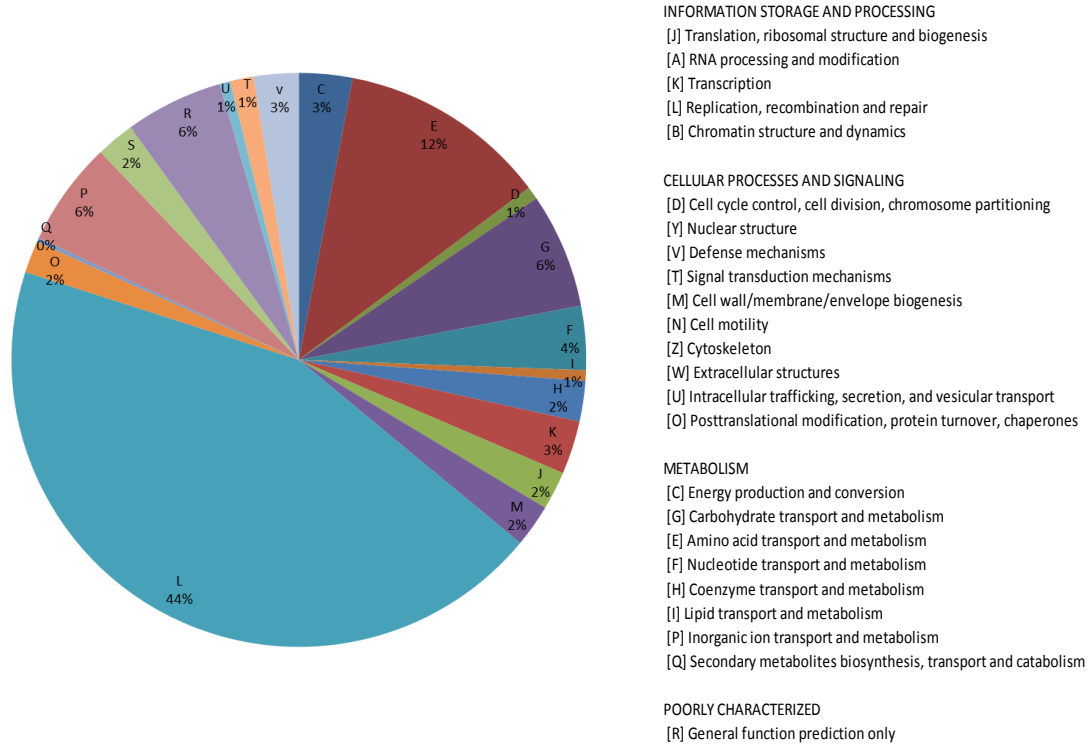

45

46

47 Supplementary Figure 4. Distribution of COG Categories for the 2860  
 48 OGs contributed by TIFN1-to-7 *L. lactis* genomes to the pan-genome  
 49 of *L. lactis* reference strains

50

51

52

53

54

55

56

57

58

59

60

61

62

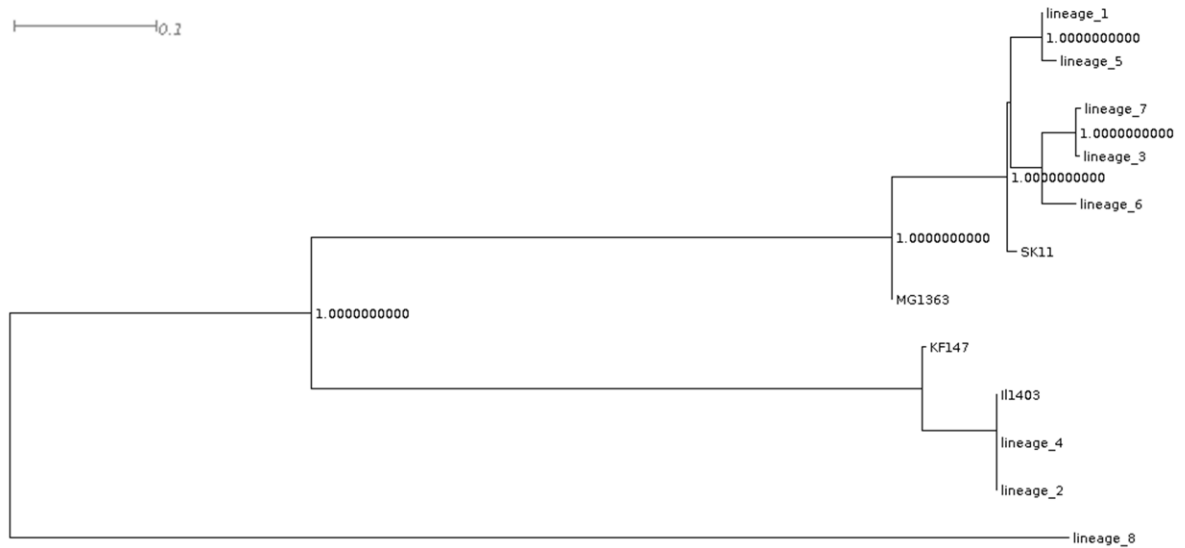

63  
 64 Supplementary Figure 5. Clustering of TIFN 1-to-8 *L. lactis*, *Lc.*  
 65 *mesenteroides* and the 4 reference *L. lactis* strains. The dendrogram  
 66 was constructed based on the concatenated variable nucleotides of the  
 67 core OGs that are present as a single copy on all the genomes included  
 68 to the clustering.

69  
 70  
 71  
 72  
 73  
 74  
 75  
 76  
 77  
 78  
 79  
 80  
 81  
 82

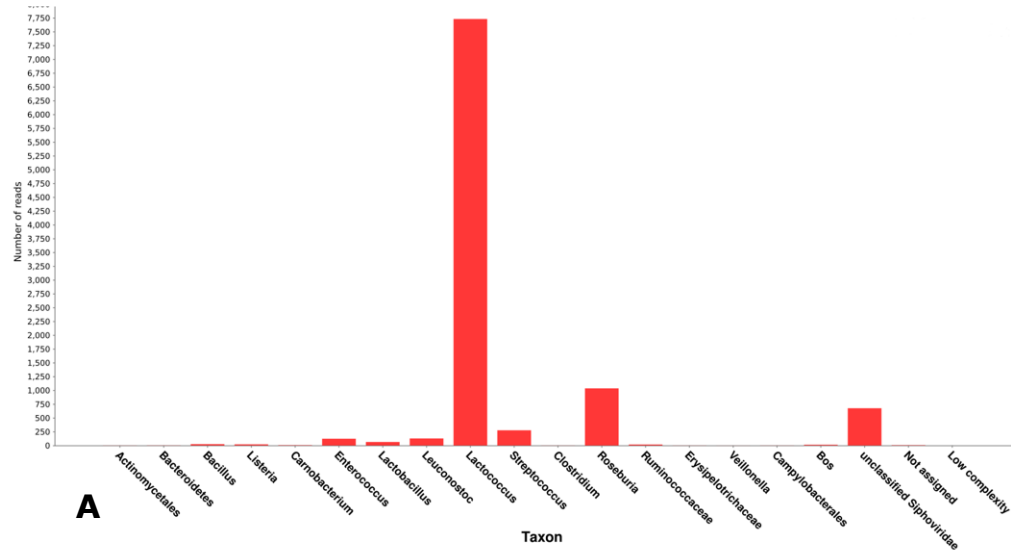

**A**

83  
84

**B**

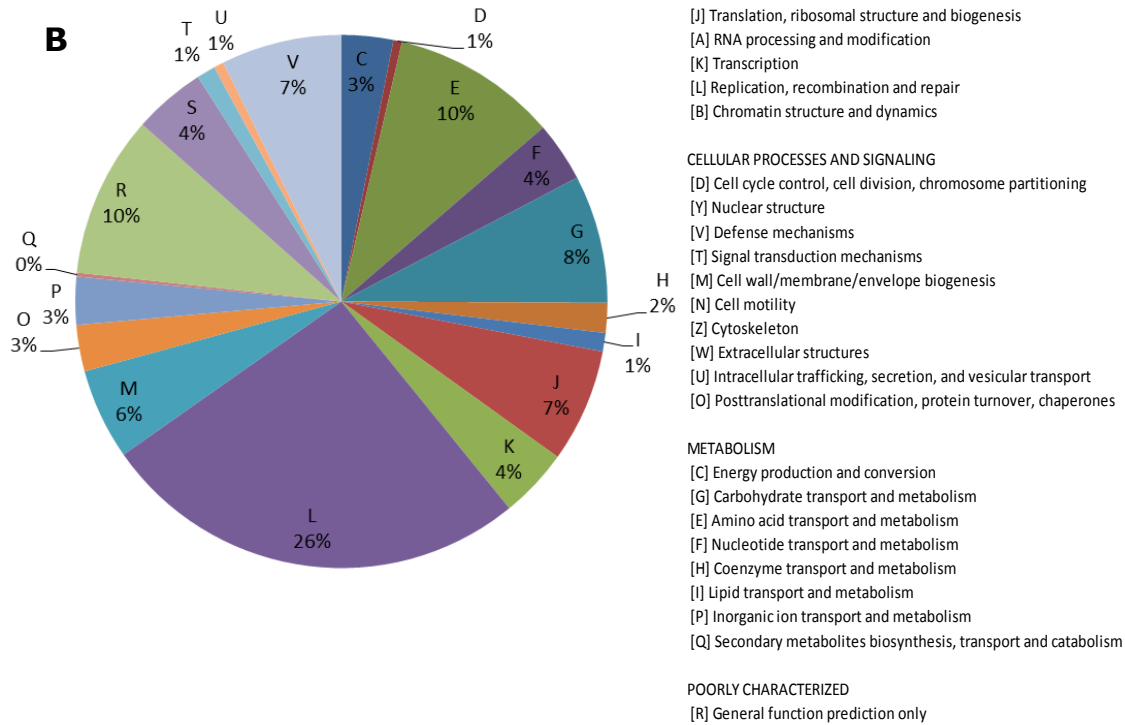

85  
86  
87  
88  
89  
90  
91  
92  
93  
94  
95  
96  
97

98 Supplementary Figure 6. Taxonomy-based binning of metagenome  
 99 reads that do not match to TIFN 1-to-8 genomes. Panel A: Taxa  
 100 identified for the sequences of the metagenome that do not match to  
 101 TIFN genomes. Panel B: Distribution of COG Categories for the reads  
 102 in Panel A.

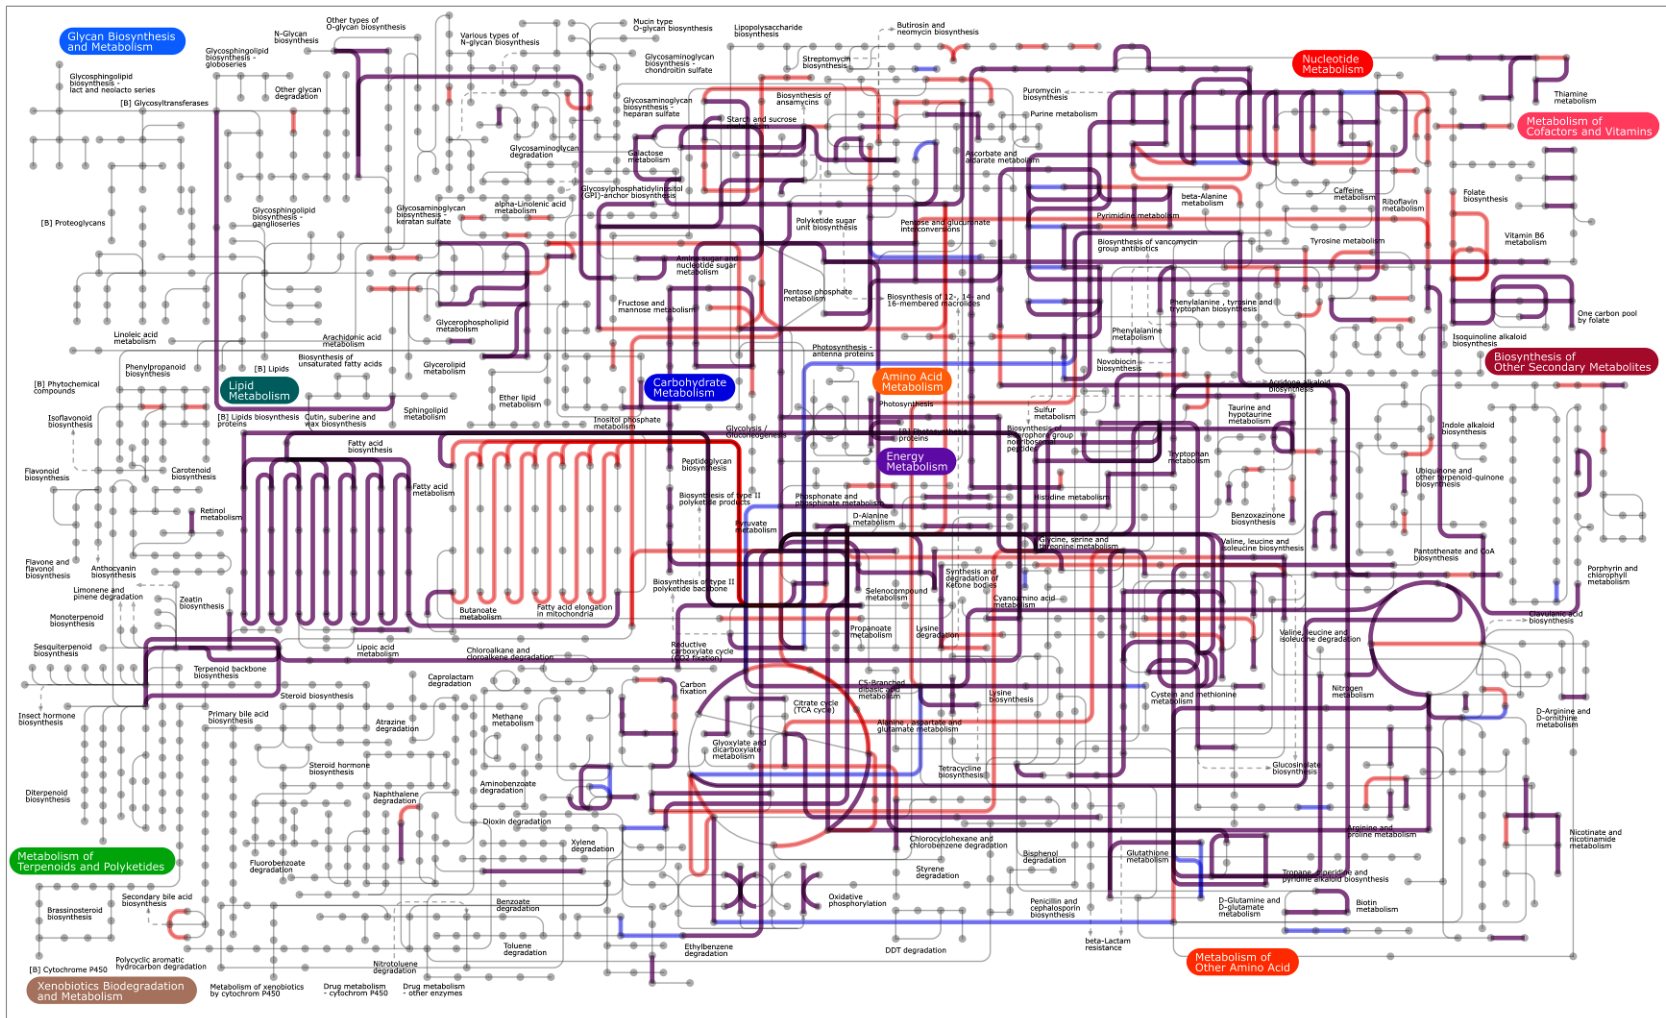

103  
 104 Supplementary Figure 7. Global metabolic maps of *L. lactis* pangenome (red lines) and TIFN8 *Lc.*  
 105 *mesenteroides* genome (blue lines). The shared pathways are represented with purple lines.

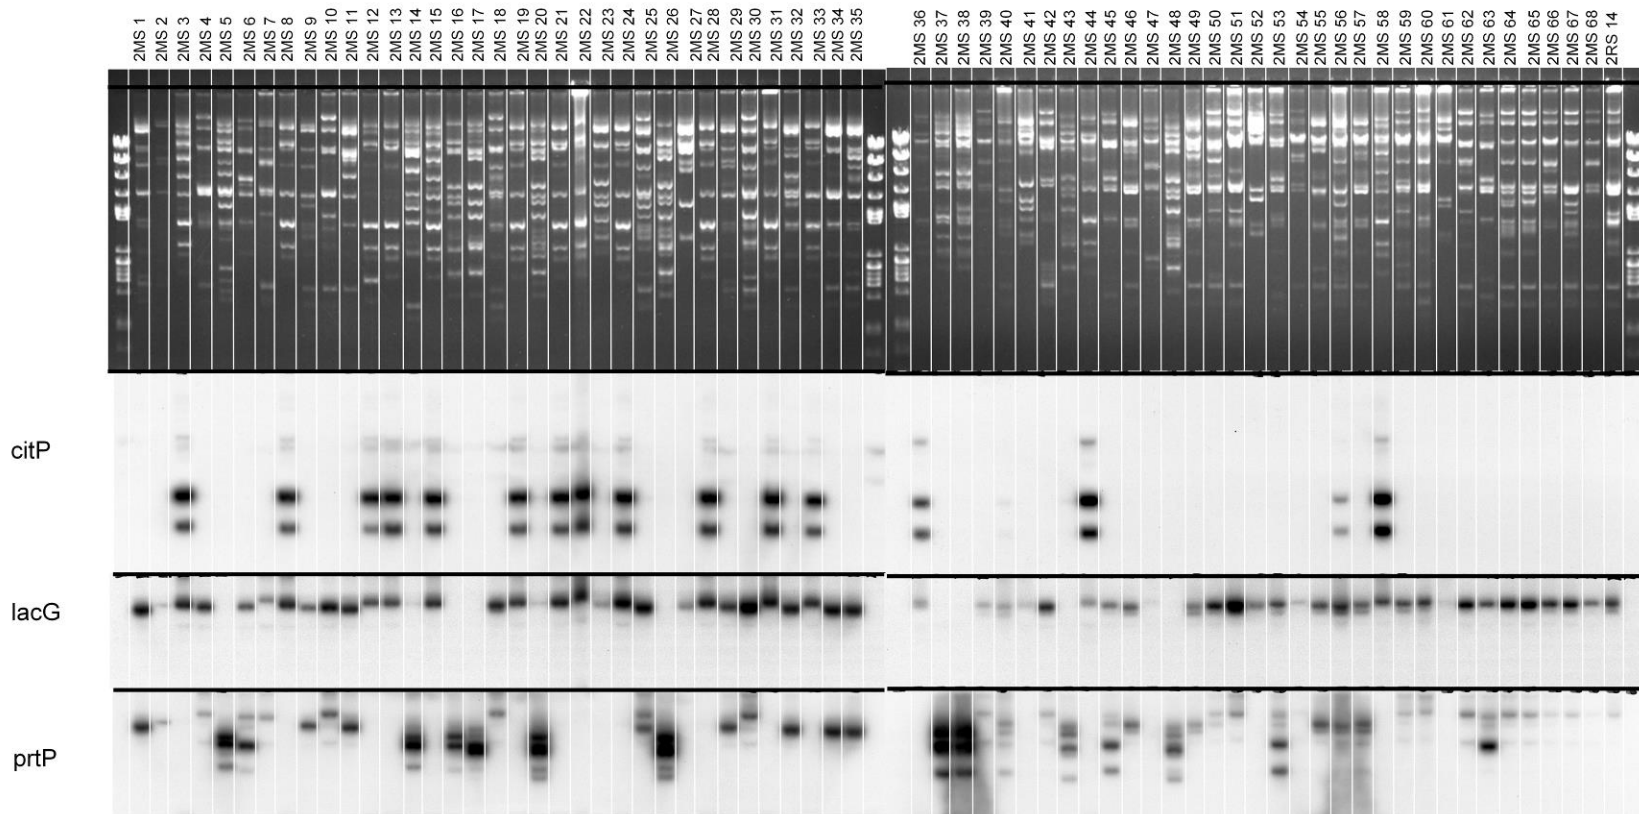

106  
 107 Supplementary Figure 8: Agarose gel electrophoresis of plasmid preparations, and southern blot  
 108 hybridization patterns for *citP*<sup>1</sup>, *lacG*<sup>2</sup>, and *prtP*<sup>3</sup> genes. The codes of the isolates that the plasmid profiles  
 109 belong to were given at the top of the figure.



## 110 **Supplementary Information for Methods**

111

### 112 **Lab scale mini-cheese making**

113 2L of bovine milk was standardized for fat (3.5 %), protein (3.4 %) and lactose (4.5 %) content, and heat treated at 72.5 °C for 9 s. The starter culture was propagated at 20 °C for 20 h in sterile skimmed milk two times prior to cheese making. The cheese milk was warmed to 32 °C, and supplemented with 230 µL of renneting enzyme (Kalase, 118 150 IMCU, CSK Food Enrichment, Ede, The Netherlands), 400 µL of a 119 33 % (wt/vol) CaCl<sub>2</sub> solution, 400 µL of NaNO<sub>3</sub> solution, and 1 % (v/v) 120 of propagated starter culture per liter of milk. After curdling at 30.5 °C 121 for 35-45 min, the curd was cut for 10 min using a custom-made 122 stirring device. 800 mL of whey was removed and replaced with 700 123 mL of sterile deionized water at 45 °C. The curd was incubated at 36 124 °C for 45 min with gentle stirring. Whey was removed from curd under 125 1kg weight pressure for 1,5 h at 30°C. The cheese was incubated at 126 30 °C until the pH was reduced to the range of 5.4-5.6. Subsequently, 127 it was brined with a sterile 19 % (wt/vol) NaCl solution for 4 h at 13 128 °C to obtain 3 % salt in dry matter in the center of the cheese. The 129 cheese with the final moisture content in the range of (42-44) % and 130 pH in the range of (5.4-5.2) was vacuum-packed and ripened at 13 °C 131 for 6 weeks.

132

### 133 **Total genomic DNA isolation from the starter culture**

134 2,5 gr of propagated starter culture was mixed with 2 % (wt/vol) 135 sodium citrate solution at 45 °C in 25 ml final volume, and 136 homogenized for 5 min with stomacher. The homogenate was 137 centrifuged at 13.750 g for 10 min at room temperature (Beckman 138 Avanti J-20, CA, USA). The supernatant and fat layers were removed

139 and the cells were re-suspended in 1 ml of the same solution at 45 °C  
140 for washing. The cell suspension was centrifuged at 10.750 g for 5  
141 min (Eppendorf 5417R Microcentrifuge, Hamburg, Germany), and the  
142 washing step was repeated for 2-3 times until all fat was removed. The  
143 DNA from the washed cell pellet was further isolated with Quiagen  
144 DNeasy Blood and Tissue Isolation Kit with the following modifications.  
145 The cells were lysed in 1 ml of lysis buffer for 1 h at 37 °C. All kit  
146 ingredients were adjusted to 1 ml lysis volume. The lysed cell  
147 suspension was protease treated for 1 h at 56 °C and RNase treated  
148 for 30 min at room temperature subsequently. Final DNA solution was  
149 applied to a single spin column, and washing steps were repeated 2  
150 times to get rid of rest of the milk culture impurities. DNA was eluted  
151 with 300 µl of nuclease free water in three steps (100 µl in each step),  
152 the concentrations were determined by Nanodrop (Coleman  
153 technologies Inc., Glen Mills, PA, USA ) and 0.8 % (wt/vol) agarose  
154 gels.

155

### 156 **Quantitative PCR**

157 QPCR reactions were performed in 20 µl of final volume, combining 10  
158 µl of SYBR® Green PCR master mix (Applied Biosystem, Warrington,  
159 UK) with 0,2 µl of each primer (10 µM), and 2 µl of DNA template. PCR  
160 amplification (7500 Fast System, Applied Biosystem, Warrington, UK)  
161 was initiated with 10 min of initial denaturation at 95 °C, followed with  
162 40 cycles of 15 s of denaturation at 95 °C and 1 min of annealing and  
163 extension at 60 °C.

164

### 165 **Determination of community dynamics during cheese** 166 **manufacturing and ripening**

167 For the time series analysis, 10 g of samples were collected at 8 points  
168 during cheese manufacturing: from initial starter culture just before  
169 milk inoculation, starter culture inoculated milk (zero point), pressed  
170 cheese, 24-h-incubated cheese, brined cheese, 2-weeks-ripened  
171 cheese and 6-weeks-ripened cheese. The samples were homogenized  
172 with 2 % (wt/vol) sodium citrate solution at 45 °C in 100 ml final  
173 volume, diluted from  $10^{-1}$  to  $10^{-8}$  with peptone water, and plated on  
174 selective media. M17 agar<sup>4</sup> supplemented with 0.5 % (wt/vol) lactose  
175 and Reddy agar<sup>5</sup> were used for the isolation of lactococci at 30 °C and  
176 MRS agar (Merck, Darmstadt, Germany) supplemented with  
177 vancomycin (20 µg/ml) for the isolation of *Leuconostoc* at 25 °C. The  
178 dilutions plates that has between 10 and 150 colonies were considered  
179 relevant for isolation, and all the colonies present on the relevant  
180 dilution plate were picked to obtain an unbiased lineage distribution.  
181 The isolated colonies were activated in the liquid culture of the same  
182 isolation medium, and stored in glycerol stocks (30 % glycerol, 70 %  
183 liquid culture) at -80 °C.

184

185 Phenotypic differentiation of *Lactococcus* subspecies and bio-varieties  
186 was achieved using previously established phenotypic analysis<sup>6</sup>.  
187 Protease activities were determined with glycerophosphate milk agar<sup>7</sup>  
188 screening, and fingerprinted with the AFLP protocol optimized for *L.*  
189 *lactis*<sup>8</sup>. For the quantification of genetic lineages during cheese  
190 manufacturing, the highest viable count for a particular genetic lineage  
191 among all selective media was taken as the closest approximation of  
192 the contribution for that genetic lineage to the community.

193

194 **Plasmid isolation, Southern blot hybridizations, and high-**  
195 **throughput plasmid profiling**

196 The overnight grown cultures in M17 were diluted 10 times with the  
197 same medium, incubated further to OD<sub>600nm</sub> of 0,5. 5 ml of this culture  
198 was centrifuged at 1560 g for 10 min (Heraeus Megafuge 1R, Heraeus  
199 Instruments, Hanau, Germany), washed with 1 ml of nuclease free  
200 water and centrifuged again at 20.800 g for 2 min (Eppendorf 5417R  
201 Microcentrifuge, Hamburg, Germany). The pellet was re-suspended in  
202 380 µl of lysis buffer (6.7 % sucrose, 500 mM Tris.HCl, 1 mM EDTA pH  
203 8.0, 10 µg/ml RNase) and incubated for 2 min at 37 °C.  
204 Subsequently, 96 µl of lysozyme (10 mg/ml in 25mM Tris.HCl pH 8.0)  
205 was added to lysis solution and incubated further for 7 min at 37 °C.  
206 250 µl of Tris-EDTA solution (50 mM EDTA, 50 mM Tris pH 8.0) and 28  
207 µl of SDS solution (20 % SDS in 50 mM Tris-HCl, 20 mM EDTA pH  
208 8.0) was added sequentially with gentle mixing in the end of lysozyme  
209 treatment. The lysis was completed with 10 min incubation at 37 °C,  
210 and 10 s full speed vortexing. Before the DNA extraction, the lysate  
211 was treated with NaOH (addition of 28 µl of NaOH (3 M), 10 min  
212 incubation on ice), with Tris.HCl (addition of 50 µl of Tris.HCl (2 M, pH  
213 7.0), 5 min incubation at 25 °C), and with NaCl (addition of 72 µl of 5  
214 M NaCl, 30 min incubation on ice) sequentially. The cell debris was  
215 separated by 10 min centrifugation at 20.800 g (Eppendorf 5417R  
216 Microcentrifuge, Hamburg, Germany), and the plasmid containing  
217 supernatant was taken for phenol-chloroform extraction (addition of  
218 700 µl cold phenol saturated with 3 % NaCl, centrifugation at 20.800 g  
219 (Eppendorf 5417R Microcentrifuge, Hamburg, Germany) for 5 min,  
220 transferring the water phase into 700 µl chloroform, centrifugation at  
221 20.800 g (Eppendorf 5417R Microcentrifuge, Hamburg, Germany) for 2  
222 min. The DNA in the water phase was precipitated with an equal  
223 volume of isopropanol, and by centrifugation at 20.800 g (Eppendorf  
224 5417R Microcentrifuge, Hamburg, Germany) for 5 min. The pellet was

225 washed with 500 µl of ethanol (70 %), dried for 20 min at room  
226 temperature and dissolved in 50 µl TE buffer. Finally 10 µl was loaded  
227 on agarose gel (0.7 % agarose, 0.5 µg/ml EtBr) and run at 70 mA for  
228 4 h for profiling. Southern Blot Hybridizations were performed as  
229 described before<sup>9</sup>.

230

231 High-throughput Plasmid Profiling was based on fluorophore labeling of  
232 digested plasmid DNA fragments. FAM6 fluorophore labeled adapters  
233 were prepared from linker I ([6FAM] GAC GAT GAG TCC TGA G) and  
234 linker II (TAC TCA GGA CTC AT) in adapter mix (50 µM linker I, 50 µM  
235 linker II, 4.5 mM Tris, 0.45 mM EDTA) by heating for 5 min at 95 °C  
236 and cooling down to 5 °C in 30 min. 10 µl of plasmid DNA was  
237 digested with 0.2 Unit *MseI* restriction enzyme (New England Biolabs,  
238 Beverly, MA, USA) in 10 µl of restriction buffer for 2 h at 37 °C. 5 µl of  
239 digested plasmid DNA was ligated with adapters in ligation mix (1 X  
240 ligation buffer, 2.5 µM adapter, 0.2 Unit T4 DNA ligase) at 37 °C for 3  
241 h. Ligated fragments were purified with MSB HTS PCRapace DNA  
242 fragment purification kit (Invitex GmbH, Berlin, Germany) according to  
243 the manufacturer's instruction. For capillary electrophoresis, 8 volumes  
244 of ligation product were mixed with 1.75 volume of PCR grade water  
245 and 0.25 volume of MegaBACE™ ET550-R size standard (GE  
246 Healthcare, Little Chalfont Buckinghamshire, UK). All samples were  
247 analyzed with MegaBACE 500 48-capillary electrophoresis system (GE  
248 Healthcare, Diegem, Belgium) using FAM6 sensitive detector according  
249 to manufacturer's protocol.

250

### 251 **Phage isolations and sensitivity testing**

252 Starter culture was propagated (1 % inoculated) two times in sterile  
253 skimmed milk for 20 h at 20 °C. 10 ml of culture was centrifuged at

254 3000 g for 10 min (Heraeus Megafuge 1R, Heraeus Instruments,  
255 Hanau, Germany), and the supernatant was used as a phage solution.  
256 TIFN1-7 strains were used as host to test the presence of phages in  
257 the supernatant. 100 µl of a full grown strain was mixed with 100 µl of  
258 phage solution (in dilution series) and incubated for 10 min at 37 °C. 3  
259 ml LM17 soft agar with 10 mM CaCl<sub>2</sub> (46 °C) was added to phage-  
260 bacteria mix and the mixture was plated on M17 plates (1 % lactose  
261 and 10 mM CaCl<sub>2</sub>). The plates were incubated at 30 °C, and the phage  
262 titer was determined after 20 h. Single plaques were isolated with a  
263 Pasteur pipette from agar plates with the host strains TIFN1, TIFN5  
264 and TIFN7, and kept in 1 ml of 50 mM Tris.HCl phage buffer (pH 7.5,  
265 100 mM NaCl, 5 mM CaCl<sub>2</sub>, 1 mM MgSO<sub>4</sub>, 0.01 % gelatin). The phage  
266 solution was stored at 4 °C.

267

268 High density phage solutions were prepared by cell culture lysis for  
269 sensitivity testing. Phage solutions from previous isolations were  
270 mixed with over-night grown cells in 5:1 volume ratio, followed by 10  
271 min adsorption time at 37 °C and diluted 10 times in M17 broth (1 %  
272 lactose, 10 mM CaCl<sub>2</sub>). Lysis of the culture occurred after 6 h of  
273 incubation at 30 °C. Cell debris was removed by centrifugation, the  
274 supernatant was filter sterilized and the phage titer was determined by  
275 plating as described before. If the phage titer was low, the phage  
276 isolation was repeated either by another plate lysis or cell culture lysis.  
277 Four isolates of each genetic lineage (including the TIFN strains) were  
278 tested for their phage sensitivity, using the high density phage  
279 preparations of φtifn1, φtifn5, φtifn7 and Ur-supernatant with  
280 dilutions from 10<sup>10</sup> to 10<sup>2</sup> pfu/ml.

281

## 282 **UR Back-Slopping and Phage Titer Determinations**

283 The starter culture was cultivated in skimmed milk (0 % fat, UHT,  
284 Friesland Campina, Ede, The Netherlands) at 30 °C overnight. In back-  
285 slopping regime, the culture was further sequentially propagated by  
286 inoculation of the 5 ml skimmed milk with 50 µl (1 %) of the previous  
287 day culture and incubated at 30 °C for 24 hours. The back-slopping  
288 was performed in duplicate. Indicator strain TIFN1 was grown in M17  
289 broth media (Oxoid, Hampshire, UK) with 1 % of lactose (w/v) at 30  
290 °C overnight. Bacteriophage titers were determined as follow; 10 ml of  
291 culture was centrifuged at 3000 g for 10 min (Heraeus Megafuge 1R,  
292 Heraeus Instruments, Hanau, Germany) and the supernatant was used  
293 as phage solution. Serial dilutions of phage solution were prepared  
294 with 10 times dilutions in phage buffer (pH 7.5, 50 mM Tris.HCl, 100  
295 mM NaCl, 5 mM CaCl<sub>2</sub>, 1 mM MgSO<sub>4</sub>, 0.01 % gelatin). 100 µl of Ur  
296 culture supernatant (or phage dilutions) were added to 100 µl of the  
297 overnight grown indicator strain, kept at 37 °C for 10 min, and  
298 subsequently mixed with 3 ml of M17 agar (1 % lactose, 10 mM of  
299 CaCl<sub>2</sub>, 0.75 % agar) to be used as top agar. Finally, the top agar  
300 preparations were poured on M17 bottom agar plates (1 % lactose, 10  
301 mM of CaCl<sub>2</sub>, 1.5 % agar) and incubated at 30°C for 24 h in duplicate.  
302 Plaque forming units were counted and expressed as log pfu/ml.

303

## 304 REFERENCES FOR SUPPLEMENTARY FIGURES AND NOTE

305

- 306 1. David, S., van der Rest, M.E., Driessen, A.J., Simons, G. & de Vos, W.M. Nucleotide sequence and  
307 expression in *Escherichia coli* of the *Lactococcus lactis* citrate permease gene. *Journal of*  
308 *bacteriology* **172**, 5789-5794 (1990).
- 309 2. Simons, G., Nijhuis, M. & de Vos, W.M. Integration and gene replacement in the *Lactococcus*  
310 *lactis* lac operon: induction of a cryptic phospho-beta-glucosidase in LacG-deficient strains.  
311 *Journal of bacteriology* **175**, 5168-5175 (1993).
- 312 3. de Vos, W.M., Vos, P., de Haard, H. & Boerrigter, I. Cloning and expression of the *Lactococcus*  
313 *lactis* subsp. *cremoris* SK11 gene encoding an extracellular serine proteinase. *Gene* **85**, 169-176  
314 (1989).
- 315 4. Terzaghi, B.E. & Sandine, W.E. Improved medium for lactic streptococci and their bacteriophages.  
316 *Appl Microbiol* **29**, 807-813 (1975).
- 317 5. Reddy, M.S., Vedamuthu, E.R., Washam, C.J. & Reinbold, G.W. Agar medium for differential  
318 enumeration of lactic streptococci. *Appl Microbiol* **24**, 947-952 (1972).
- 319 6. Rademaker, J.L. et al. Diversity analysis of dairy and nondairy *Lactococcus lactis* isolates, using a  
320 novel multilocus sequence analysis scheme and (GTG)<sub>5</sub>-PCR fingerprinting. *Appl Environ Microbiol*  
321 **73**, 7128-7137 (2007).

- 322 7. Limsowtin, G.K.Y., Terzaghi, B.E. Agar medium for the differentiation of "fast" and "slow"  
323 coagulating cells in lactic streptococcal cultures. *N.Z.J. Dairy Science and Technology* **11**, 2  
324 (1976).
- 325 8. Kutahya, O.E. et al. High-resolution amplified fragment length polymorphism typing of  
326 *Lactococcus lactis* strains enables identification of genetic markers for subspecies-related  
327 phenotypes. *Appl Environ Microbiol* **77**, 5192-5198 (2011).
- 328 9. Siezen, R.J. et al. Genome-scale diversity and niche adaptation analysis of *Lactococcus lactis* by  
329 comparative genome hybridization using multi-strain arrays. *Microb Biotechnol* **4**, 383-402  
330 (2011).
- 331
- 332
